# Supplementary material for: The regulatory effects of miR-138-5p on selenium deficiency-induced chondrocyte apoptosis are mediated by targeting SelM
Source: Royal Society of Chemistry journal article supplement (doi:10.1039/c9mt00006b), 2019-03-07
Supplement: c9mt00006b1.pdf [file c9mt00006b1.pdf]

**Table S1. Primer sequences of qRT-PCR**

| Gene           | Forward 5'to '3          | Reverse 5'to '3          |
|----------------|--------------------------|--------------------------|
| GPX1           | ACGGCGCATCTTCCAAAG       | TGTTCCCCCAACCATTCTC      |
| GPX2           | ATCGCCAAGTCCTTCTACGA     | ACGTTCTCGATGAGGACCAC     |
| GPX3           | CCTGCAGTACCTCGAACTGA     | CTTCAGTGCAGGGAG GATCT    |
| GPX4           | CTTCGTCTGCATCATCACAA     | TCGACGAGCTGAGTGTAATTCC   |
| DIO1           | GCGCTATAACCACAGGCAGTA    | GGTCTTGCAAATGTCACCAC     |
| DIO2           | ATTTGCTGATCACGCTTACG     | GCTCAGAAACAGCACCATGT     |
| DIO3           | CTGTGCATTTCGAAGAAGAT     | GCCGACTTGAAGAAGTCCAG     |
| Txnrd1         | TACGCCTCTGGGAAATTCGT     | CTTGCAAGGCTTGTCCCAGTA    |
| Txnrd2         | GCTCTTAAAGATGCCCAGCACTAC | GAACAGCTTGAGCCATCACAGA   |
| Txnrd3         | CCTGGCAAACGCTAGTTGT      | CGCACCATTACTGTGACATCTAG  |
| SelW           | TGGTGTGGGTCTGCTTTACG     | CCAAAGCTGGAAGGTGCAA      |
| SelO           | CCAGCGTTAACCGGAATGAT     | ATGCGCCTCCTGGATTTCT      |
| Sep15          | ACTTGCTTCTCCAGTAACTTGCT  | GCCTACAGAAATGGATCCAATA   |
| SelP           | CCAAGTGGTCAGCATTCACATC   | ATGACGACCACCCTCACGAT     |
| SelK           | GAAGAGGGCCTCCAGGAAAT     | CAGCCATTGGTGGTGGACTAG    |
| SelI           | TGCCAGCCTCTGAACTGGAT     | TGCAAACCCAGACATCACCAT    |
| SelU           | GATGCTTTCAGGCTTCTTCC     | CTGTCTTCTGCTCCAATCA      |
| SelT           | AGGAGTACATGCGGGTCATCA    | GACAGACAGGAAGGATGCTATGTG |
| SePX1          | TGGCAAGTGTGGCAATGG       | GAATTTGAGCGAGCTGCTGAAT   |
| SelH           | CATCGAGCACTGCCGTAG       | GACACCTCGAAGCTGTTCT      |
| SelM           | AAGAAGGACCACCCAGACCT     | GCTGTCTGTCTCCCTCATC      |
| SelN           | CAGGATCCATGCTGAGTTCCA    | GAGAGGACGATGTAACCCGTAAAC |
| SelS           | CCGACATGGTGGTAAGAAGACA   | GCTTGTGCATTCAACTCCTCTTG  |
| SPS2           | CGTTGGGTATCGGAACTGAC     | CGTCCACCAGAGGGTAGAAA     |
| BCL-2          | ATCGTCGCCTTCTTCGAGTT     | ATCCCAATCCTCCGTTGTCT     |
| caspace-3      | CATCTGCATCCGTGCGTCTGA    | CTCTCGGCTGTGGTGGTGAA     |
| caspace-9      | ATTCTTTCCAGGCTCCATC      | CACTCACCTTGTCCCTCCAG     |
| BAX            | GATGAAGCCACCCAGCAGTA     | TGGATTCTCACAGTAGGAGGATG  |
| BAK            | ACCCGGAGATCATGGAGA       | GATGCCTTGCTGGTAGACG      |
| Drp1           | GGCAGTCACAGCAGCTAACA     | GCATCCATGAGATCCAGCTT     |
| Mff            | TGGGAAGGCTGAAGAGAGAA     | GGTGTCCCTCAAGTGTGGT      |
| Opa1           | GCTACGGACCAGGGTTATGA     | GCTCAAGCATCCGTTGGTAT     |
| Mfn1           | TGAGCATGTAGCAACGGAAG     | AGCAAGCTGATTGACGGTCT     |
| Mfn2           | TACCAGGCAGATTTCCATCC     | GTGATTGCATTGGAACAACG     |
| NOX2           | GGACTGTCCATCTTTGTCGT     | TTACACGGGTAGAGCAGCAC     |
| avUCP          | GATGCAGAGAAACAGAGCGG     | AAGGTGCAGAGGTGAGCGAT     |
| HK2            | TTCGACCACATCGTCCACTG     | ACCACGTCCAGGTCAAACCTC    |
| SDHB           | CGGTCCAGGGGATCTGTGCG     | AGATGCCTTCCCTGCATGAC     |
| PK             | AGCAGCAGGAGACACCGAAC     | TGAGGCGGGCAACATTCAT      |
| PDHX           | ACGCTTGGGCTCCCTAATTG     | TCCACTTTAGGAGGGGCAGA     |
| $\beta$ -actin | CCGCTCTATGAAGGCTACGC     | CTCTCGGCTGTGGTGGTGAA     |

---

gga-miR-138-5p  
U6

F: GCGCGCAGCTGGTGTTG  
F:CACGCAAATTCGTGAAGCGTTCCA

---
